# Supplementary material
Source: Springer Nature journal article supplement (https://www.springermedizin.de/resource/supplementary/12974_2011_398_MOESM3_ESM.pdf/9601592)

**Anti- $A\beta_{1-42}$   
Monomer  
Antibody,  
 $\mu\text{g}/\text{mL}$**

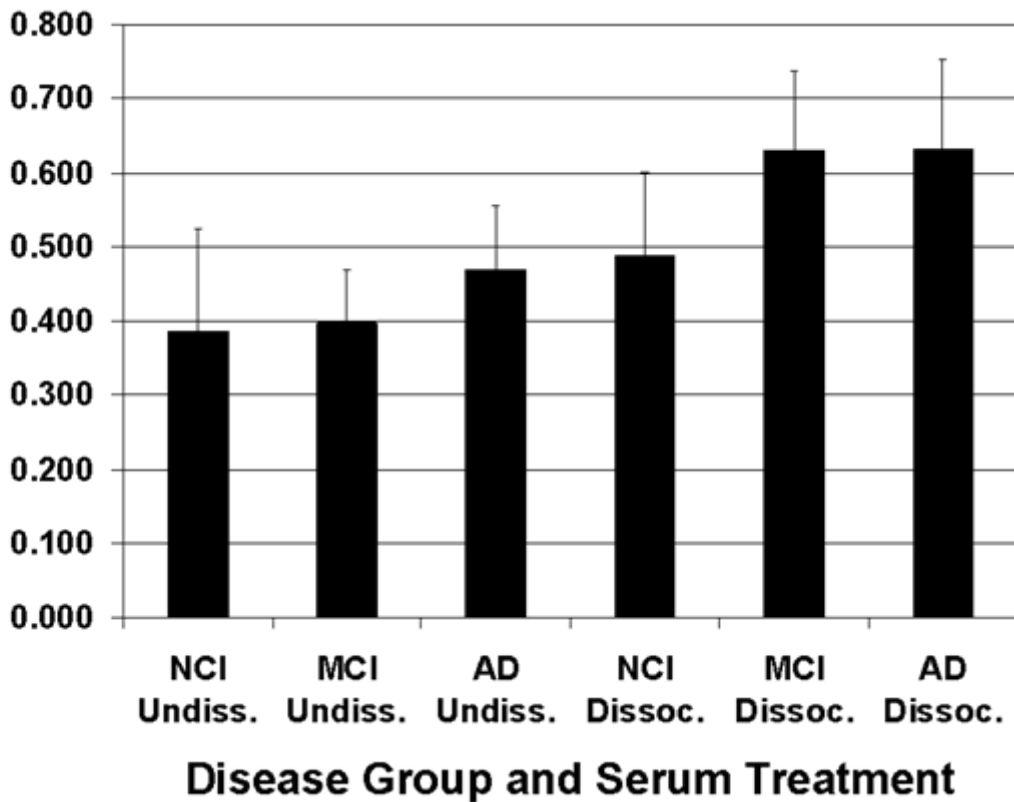

Supplement: MOESM3 [file 9601592]
